# Supplementary material for: miR-145 sensitizes breast cancer to doxorubicin by targeting multidrug resistance-associated protein-1
Source: PubMed Central journal article supplement (PMC5312343; doi:10.18632/oncotarget.10845), 2016-07-26
Supplement: oncotarget-07-59714-s001.pdf [file oncotarget-07-59714-s001.pdf]

# miR-145 sensitizes breast cancer to doxorubicin by targeting multidrug resistance-associated protein-1

## SUPPLEMENTARY FIGURES AND TABLE

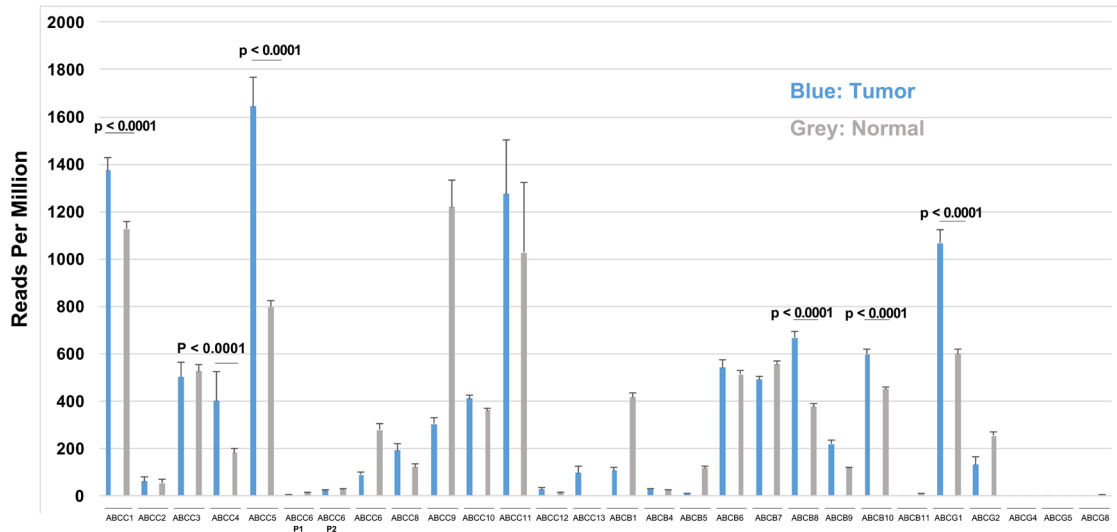

Supplementary Figure S1: MiRNAs expression level in breast cancer (and the matched normal breast tissues).

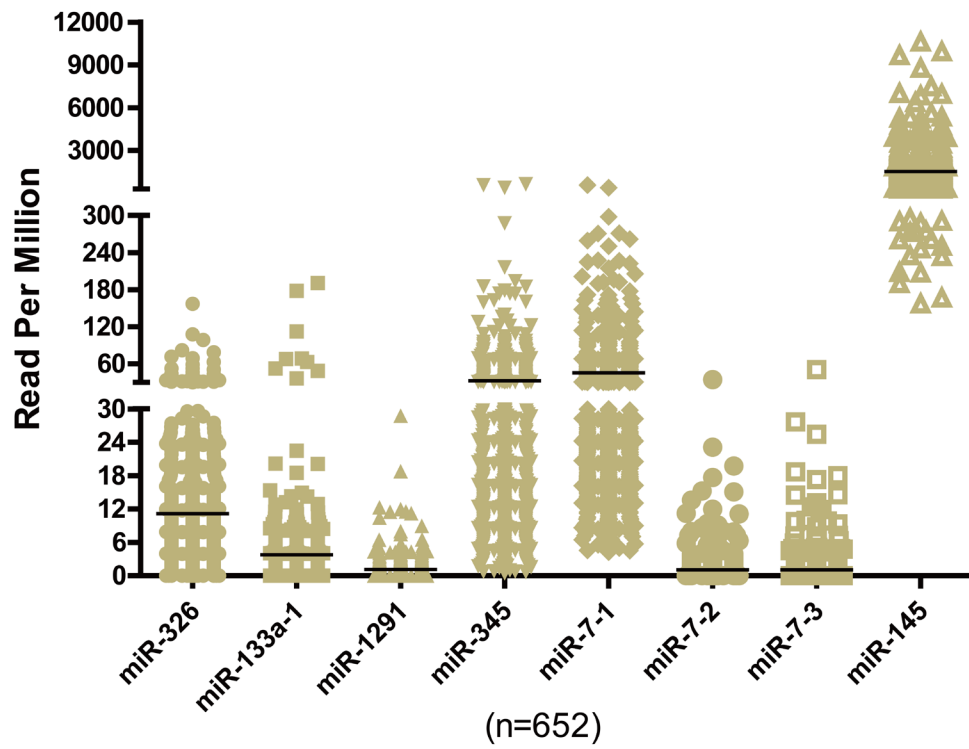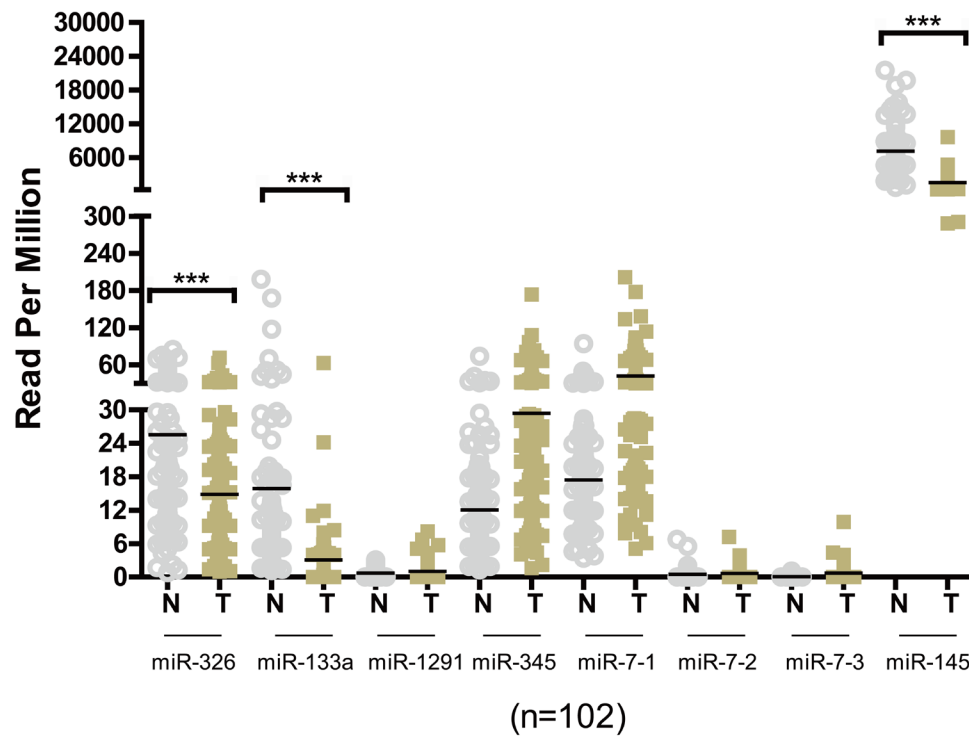

Supplementary Figure S2: Pearson correlation analysis of miR-145 and MRP1 expression level in breast cancer cell lines.

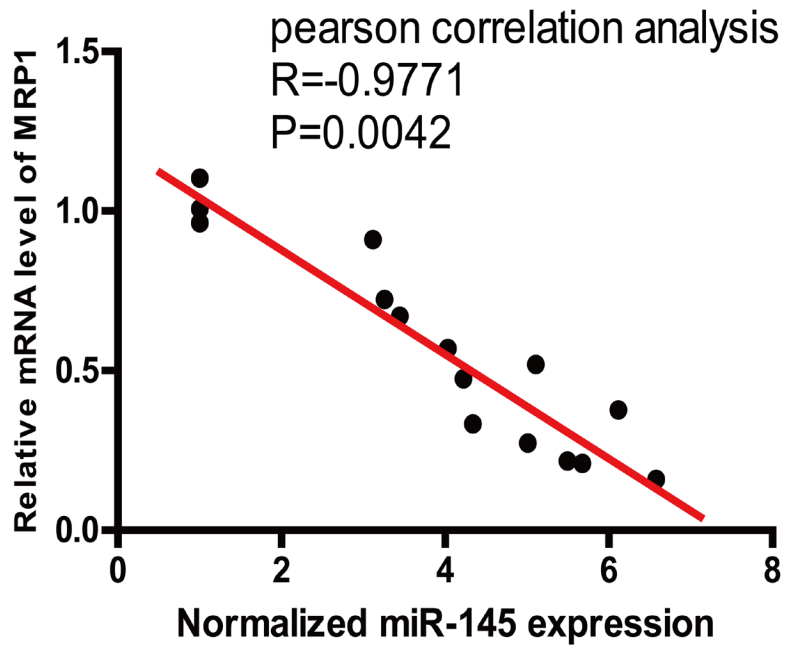

Supplementary Figure S3: ABC transporters mRNA expression level in breast cancer.

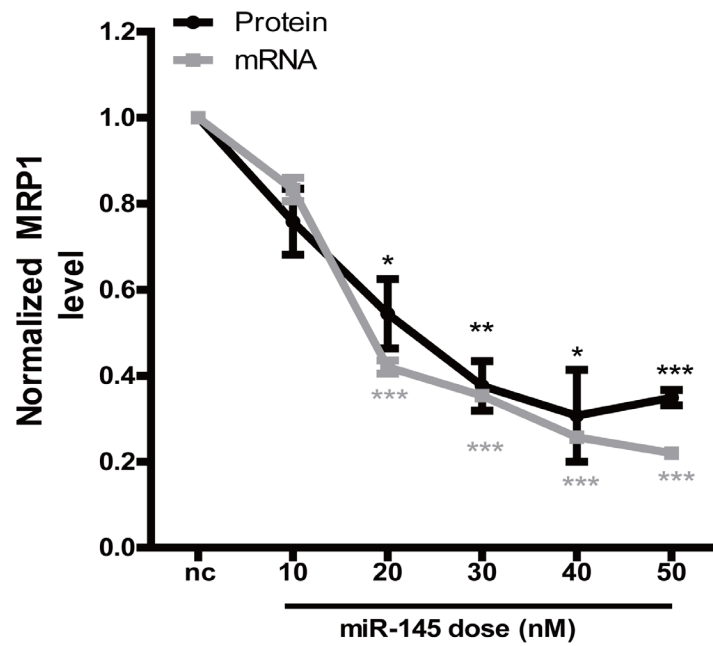

Supplementary Figure S4: MRP1 mRNA and protein expression level in MCF-7 cells transfected with indicated dose miR-145 mimics.

**Supplementary Table S1: Oligonucleotides used for the construction of plasmids or for quantitative polymerase chain reaction**

| Application                   | Oligonucleotide | Sequence (5'→3')                     |
|-------------------------------|-----------------|--------------------------------------|
| Cloning                       |                 |                                      |
| psiCHECK-ABCC1-3'UTR          | Forward         | CCTCGAGAAAGACGCCGGCTTGGTGTG          |
|                               | Reverse         | TTGCGGCCGCCTGCAAATGTTTCGCATTTCAGTGC  |
| psiCHECK2-ABCC1-3'UTR(mutant) | Forward         | TGACTTACTGACCTTATGCGAACGTTTGCAGGCGG  |
|                               | Reverse         | GTTTCGCATAAGGTCAGTAAGTCATTACAAAAGGAT |
| Universal reverse primer      |                 |                                      |
| qPCR                          |                 |                                      |
| MRP1                          | Forward         | GTCGGGGCATATTCCTGGC                  |
|                               | Reverse         | GGGCATCCTCTTTTAAGGCTG                |
| GAPDH                         | Forward         | GGTGGTCTCCTCTGACTTCAACA              |
|                               | Reverse         | GTTGCTGTAGCCAAATTCGTTGT              |
| miR-145                       | Forward         | TCCAGTTTTCCCAGGAATCCCT               |
| U6                            | Forward         | GCTTCGGCAGCACATATACTAAAAT            |
|                               | Reverse         | CGCTTCACGAATTTGCGTGTGCAT             |
